# Supplementary material for: Hotspot and Frontier Analysis of Exercise Training Therapy for Heart Failure Complicated With Depression Based on Web of Science Database and Big Data Analysis
Source: PubMed Central journal article supplement (PMC8169975; doi:10.3389/fcvm.2021.665993), 2021-05-19
Supplement: Table_1.pdf [file Table_1.pdf]

Supplemental Table 1. Co-occurrence analysis of "inflammation" AND "mitochondria" studies in 2020

| Count | Centrality | year | Keywords                    |
|-------|------------|------|-----------------------------|
| 4     | 0          | 2020 | antioxidant capacity        |
| 4     | 0          | 2020 | diabetic retinopathy        |
| 4     | 0          | 2020 | cyclic gmp amp              |
| 4     | 0          | 2020 | dehydrogenase               |
| 4     | 0          | 2020 | dna repair                  |
| 4     | 0          | 2020 | glucagon like peptide 1     |
| 4     | 0          | 2020 | cardiotoxicity              |
| 4     | 0          | 2020 | blood-brain barrier         |
| 4     | 0          | 2020 | biology                     |
| 4     | 0          | 2020 | glucose homeostasis         |
| 4     | 0          | 2020 | gene therapy                |
| 4     | 0          | 2020 | increase                    |
| 4     | 0          | 2020 | combination                 |
| 4     | 0          | 2020 | disruption                  |
| 5     | 0          | 2020 | cystic fibrosis             |
| 5     | 0          | 2020 | lipid droplet               |
| 5     | 0          | 2020 | sars-cov-2                  |
| 5     | 0          | 2020 | inflammaging                |
| 5     | 0          | 2020 | myocardial ischemia         |
| 5     | 0          | 2020 | ultrafine particle          |
| 5     | 0          | 2020 | management                  |
| 5     | 0          | 2020 | diabetic cardiomyopathy     |
| 5     | 0          | 2020 | chondrocyte                 |
| 5     | 0          | 2020 | fluorescence                |
| 5     | 0          | 2020 | platelet                    |
| 5     | 0          | 2020 | nutrition                   |
| 6     | 0          | 2020 | tau                         |
| 6     | 0          | 2020 | polyunsaturated fatty acid  |
| 6     | 0          | 2020 | sensitivity                 |
| 6     | 0          | 2020 | amyloid beta peptide        |
| 6     | 0          | 2020 | tlr4                        |
| 6     | 0          | 2020 | renin angiotensin system    |
| 6     | 0          | 2020 | mousemodel                  |
| 6     | 0          | 2020 | tumor associated macrophage |
| 7     | 0          | 2020 | microbiome                  |
| 8     | 0          | 2020 | signal                      |
| 8     | 0          | 2020 | stromal cell                |
| 11    | 0          | 2020 | sarcopenia                  |
| 12    | 0          | 2020 | covid-19                    |
