# Supplementary material for: Hotspot and Frontier Analysis of Exercise Training Therapy for Heart Failure Complicated With Depression Based on Web of Science Database and Big Data Analysis
Source: PubMed Central journal article supplement (PMC8169975; doi:10.3389/fcvm.2021.665993), 2021-05-19
Supplement: Table_2.pdf [file Table_2.pdf]

| Label                        | ID  | partition | vector | AllDegree | WeightedAllDegree | AllclosenessCentrality | BetweennessCentrality | HubWeights  | AuthorityWeights |
|------------------------------|-----|-----------|--------|-----------|-------------------|------------------------|-----------------------|-------------|------------------|
| inflammation                 | 1   | 1         | 2363   | 161       | 11957             | 1                      | 0.004079848           | 0.496312134 | 0.496312193      |
| mitochondria                 | 2   | 3         | 2335   | 161       | 11648             | 1                      | 0.004079848           | 0.483142349 | 0.483142297      |
| oxidative stress             | 3   | 2         | 1650   | 161       | 8591              | 1                      | 0.004079848           | 0.385957841 | 0.385957836      |
| apoptosis                    | 4   | 1         | 1017   | 161       | 5507              | 1                      | 0.004079848           | 0.274757997 | 0.274757997      |
| activation                   | 5   | 1         | 747    | 160       | 4134              | 0.99382716             | 0.004049813           | 0.203889632 | 0.203889632      |
| expression                   | 6   | 1         | 675    | 161       | 3439              | 1                      | 0.004079848           | 0.169876515 | 0.169876513      |
| nf-kappa-b                   | 7   | 2         | 423    | 159       | 2342              | 0.987730061            | 0.003959244           | 0.116678008 | 0.116678006      |
| dysfunction                  | 8   | 4         | 396    | 161       | 2205              | 1                      | 0.004079848           | 0.11827609  | 0.118276089      |
| autophagy                    | 9   | 1         | 387    | 159       | 2191              | 0.987730061            | 0.003893561           | 0.109738303 | 0.109738302      |
| metabolism                   | 10  | 3         | 365    | 159       | 1928              | 0.987730061            | 0.003893062           | 0.099918037 | 0.099918038      |
| cells                        | 11  | 4         | 364    | 147       | 1791              | 0.92                   | 0.003064897           | 0.099044716 | 0.099044715      |
| mechanisms                   | 12  | 4         | 326    | 157       | 1735              | 0.975757576            | 0.003762927           | 0.090685706 | 0.090685706      |
| inhibition                   | 13  | 1         | 312    | 157       | 1718              | 0.975757576            | 0.003698468           | 0.091990244 | 0.091990243      |
| cell-death                   | 14  | 5         | 306    | 148       | 1718              | 0.925287356            | 0.003189401           | 0.086398435 | 0.086398436      |
| mitochondrial dysfunction    | 15  | 2         | 313    | 158       | 1640              | 0.981707317            | 0.003837851           | 0.079141316 | 0.079141315      |
| disease                      | 16  | 4         | 298    | 153       | 1503              | 0.952662722            | 0.003500575           | 0.078879472 | 0.078879472      |
| nitric-oxide                 | 17  | 2         | 284    | 154       | 1495              | 0.958333333            | 0.003595648           | 0.074871516 | 0.074871517      |
| obesity                      | 18  | 3         | 261    | 133       | 1471              | 0.851851852            | 0.002221724           | 0.073671204 | 0.073671204      |
| insulin-resistance           | 19  | 3         | 273    | 142       | 1417              | 0.894444444            | 0.002695585           | 0.068507289 | 0.068507289      |
| reactive oxygen species      | 20  | 2         | 245    | 150       | 1310              | 0.936046512            | 0.003236151           | 0.06709804  | 0.06709804       |
| injury                       | 21  | 4         | 219    | 146       | 1217              | 0.914772727            | 0.002931373           | 0.063266569 | 0.063266569      |
| mice                         | 22  | 4         | 231    | 155       | 1185              | 0.964071856            | 0.003628536           | 0.059790619 | 0.059790619      |
| cancer                       | 23  | 1         | 214    | 145       | 1072              | 0.90960452             | 0.002782719           | 0.056977004 | 0.056977003      |
| damage                       | 24  | 4         | 193    | 143       | 1039              | 0.899441341            | 0.002689428           | 0.055776942 | 0.055776942      |
| gene-expression              | 25  | 3         | 222    | 152       | 1022              | 0.947058824            | 0.003427402           | 0.049494189 | 0.049494189      |
| stress                       | 26  | 1         | 187    | 147       | 1003              | 0.92                   | 0.002967459           | 0.050399366 | 0.050399366      |
| protein                      | 27  | 1         | 200    | 147       | 981               | 0.92                   | 0.003210766           | 0.046600634 | 0.046600634      |
| nlrp3 inflammasome           | 28  | 1         | 183    | 136       | 974               | 0.865591398            | 0.002504668           | 0.044970281 | 0.044970282      |
| death                        | 29  | 1         | 179    | 135       | 967               | 0.860926567            | 0.002375084           | 0.050620282 | 0.050620282      |
| skeletal-muscle              | 30  | 3         | 182    | 134       | 932               | 0.856382979            | 0.002382784           | 0.047803434 | 0.047803435      |
| mitophagy                    | 31  | 1         | 145    | 135       | 883               | 0.860926567            | 0.002489017           | 0.043383428 | 0.043383427      |
| in-vitro                     | 32  | 1         | 184    | 142       | 859               | 0.894444444            | 0.00277636            | 0.046115    | 0.046115         |
| pathway                      | 33  | 1         | 152    | 131       | 847               | 0.842931937            | 0.002229131           | 0.045963558 | 0.045963558      |
| in-vivo                      | 34  | 2         | 173    | 145       | 837               | 0.90960452             | 0.003144606           | 0.042538789 | 0.042538789      |
| protects                     | 35  | 4         | 128    | 133       | 818               | 0.851851852            | 0.002195401           | 0.043509584 | 0.043509584      |
| liver                        | 36  | 4         | 148    | 133       | 816               | 0.851851852            | 0.002352928           | 0.041453994 | 0.041453994      |
| sepsis                       | 37  | 4         | 138    | 121       | 801               | 0.800995025            | 0.001731481           | 0.040393577 | 0.040393577      |
| endoplasmic-reticulum stress | 38  | 5         | 148    | 132       | 779               | 0.847368421            | 0.002305927           | 0.037567579 | 0.037567579      |
| ros                          | 39  | 1         | 138    | 137       | 774               | 0.87027027             | 0.002547326           | 0.040383251 | 0.040383251      |
| macrophages                  | 40  | 1         | 137    | 133       | 770               | 0.851851852            | 0.002316395           | 0.037897205 | 0.037897205      |
| nitric-oxide synthase        | 41  | 2         | 147    | 125       | 750               | 0.817258883            | 0.00185814            | 0.034491621 | 0.034491621      |
| antioxidant                  | 42  | 2         | 130    | 133       | 744               | 0.851851852            | 0.002339943           | 0.040984665 | 0.040984665      |
| aging                        | 43  | 3         | 133    | 133       | 744               | 0.851851852            | 0.002386202           | 0.039744255 | 0.039744255      |
| alzheimers-disease           | 44  | 2         | 135    | 120       | 736               | 0.797029703            | 0.001770161           | 0.037046719 | 0.037046719      |
| brain                        | 45  | 2         | 144    | 128       | 733               | 0.829896907            | 0.002220845           | 0.037917237 | 0.037917237      |
| atherosclerosis              | 46  | 3         | 125    | 129       | 682               | 0.834196891            | 0.002103671           | 0.035663982 | 0.035663981      |
| receptor                     | 47  | 1         | 134    | 128       | 672               | 0.829896907            | 0.001978142           | 0.03470684  | 0.03470684       |
| model                        | 48  | 4         | 125    | 127       | 659               | 0.825641026            | 0.001953177           | 0.03670938  | 0.03670938       |
| necrosis-factor-alpha        | 49  | 3         | 128    | 129       | 647               | 0.834196891            | 0.002242427           | 0.033363807 | 0.033363807      |
| neurodegeneration            | 50  | 2         | 119    | 116       | 638               | 0.781553398            | 0.001588919           | 0.032902208 | 0.032902208      |
| pathogenesis                 | 51  | 4         | 116    | 133       | 622               | 0.851851852            | 0.002278004           | 0.032870061 | 0.032870061      |
| activated protein-kinase     | 52  | 3         | 121    | 129       | 618               | 0.834196891            | 0.00213906            | 0.029024246 | 0.029024246      |
| cytochrome-c                 | 53  | 1         | 117    | 124       | 615               | 0.813131313            | 0.001868235           | 0.03217766  | 0.03217766       |
| rats                         | 54  | 4         | 111    | 125       | 606               | 0.817258883            | 0.001915784           | 0.033058626 | 0.033058626      |
| tnf-alpha                    | 55  | 5         | 111    | 133       | 604               | 0.851851852            | 0.002190468           | 0.028611541 | 0.028611541      |
| adipose-tissue               | 56  | 3         | 115    | 99        | 587               | 0.721973094            | 8.99E-04              | 0.031129196 | 0.031129196      |
| ischemia-reperfusion injury  | 57  | 5         | 112    | 114       | 583               | 0.774038462            | 0.001432372           | 0.031342837 | 0.031342837      |
| mouse model                  | 58  | 2         | 120    | 121       | 573               | 0.800995025            | 0.001882684           | 0.031795024 | 0.031795024      |
| hypoxia                      | 59  | 5         | 102    | 125       | 572               | 0.817258883            | 0.001997425           | 0.030042302 | 0.030042302      |
| cytokines                    | 60  | 1         | 104    | 124       | 571               | 0.813131313            | 0.001915251           | 0.031073544 | 0.031073544      |
| heart                        | 61  | 5         | 102    | 122       | 571               | 0.805                  | 0.001750095           | 0.032400453 | 0.032400453      |
| induced apoptosis            | 62  | 1         | 111    | 129       | 567               | 0.834196891            | 0.00214609            | 0.025435142 | 0.025435142      |
| tumor-necrosis-factor        | 63  | 2         | 108    | 128       | 546               | 0.829896907            | 0.002187025           | 0.027441405 | 0.027441405      |
| metabolic syndrome           | 64  | 3         | 93     | 111       | 540               | 0.763033175            | 0.001213845           | 0.026445043 | 0.026445043      |
| induction                    | 65  | 1         | 100    | 114       | 534               | 0.774038462            | 0.001435383           | 0.027893427 | 0.027893427      |
| dna-damage                   | 66  | 5         | 102    | 123       | 534               | 0.809045226            | 0.001709146           | 0.028639665 | 0.028639665      |
| diabetes                     | 67  | 3         | 86     | 117       | 526               | 0.785365854            | 0.001601466           | 0.026232679 | 0.026232679      |
| lipopolysaccharide           | 68  | 4         | 85     | 121       | 523               | 0.800995025            | 0.001719267           | 0.026048579 | 0.026048579      |
| proliferation                | 69  | 1         | 102    | 112       | 517               | 0.766666667            | 0.001441412           | 0.029789246 | 0.029789246      |
| neuroinflammation            | 70  | 2         | 92     | 102       | 515               | 0.731818182            | 9.79E-04              | 0.025141991 | 0.025141992      |
| microglia                    | 71  | 2         | 86     | 104       | 514               | 0.73853211             | 0.001213665           | 0.026961916 | 0.026961915      |
| reactive oxygen              | 72  | 2         | 100    | 122       | 512               | 0.805                  | 0.001776767           | 0.026854481 | 0.026854481      |
| glutathione                  | 73  | 4         | 88     | 112       | 503               | 0.766666667            | 0.001473079           | 0.027295427 | 0.027295427      |
| inflammasome                 | 74  | 1         | 81     | 112       | 500               | 0.766666667            | 0.001287044           | 0.022928868 | 0.022928869      |
| phosphorylation              | 75  | 1         | 90     | 130       | 492               | 0.838541667            | 0.002180688           | 0.02594008  | 0.02594008       |
| kappa-b                      | 76  | 4         | 86     | 134       | 490               | 0.856382979            | 0.002357769           | 0.024424473 | 0.024424473      |
| antioxidants                 | 77  | 2         | 86     | 117       | 485               | 0.785365854            | 0.001633534           | 0.024485766 | 0.024485766      |
| nf-kappa b                   | 78  | 1         | 74     | 120       | 478               | 0.797029703            | 0.001638622           | 0.025155965 | 0.025155965      |
| insulin resistance           | 79  | 3         | 79     | 99        | 476               | 0.721973094            | 9.77E-04              | 0.022732789 | 0.022732789      |
| er stress                    | 80  | 5         | 83     | 117       | 470               | 0.785365854            | 0.001570475           | 0.022526811 | 0.022526811      |
| nadph oxidase                | 81  | 2         | 81     | 107       | 464               | 0.748837209            | 0.001250376           | 0.023214469 | 0.023214469      |
| melatonin                    | 82  | 2         | 74     | 111       | 458               | 0.763033175            | 0.001364993           | 0.026449918 | 0.026449918      |
| fibrosis                     | 83  | 4         | 91     | 117       | 455               | 0.785365854            | 0.001435607           | 0.02434674  | 0.02434674       |
| innate immunity              | 84  | 1         | 94     | 115       | 454               | 0.777777778            | 0.001604837           | 0.021062991 | 0.021062991      |
| nitric oxide                 | 85  | 2         | 78     | 107       | 452               | 0.748837209            | 0.001249916           | 0.023540448 | 0.023540448      |
| mechanism                    | 86  | 1         | 81     | 118       | 446               | 0.789215686            | 0.001662916           | 0.023597751 | 0.023597751      |
| neuroprotection              | 87  | 2         | 81     | 105       | 446               | 0.741935484            | 0.001039308           | 0.024299504 | 0.024299504      |
| alzheimers disease           | 88  | 2         | 81     | 95        | 441               | 0.709251101            | 8.70E-04              | 0.023671071 | 0.023671071      |
| lipid-peroxidation           | 89  | 2         | 96     | 104       | 440               | 0.73853211             | 0.001261862           | 0.024492798 | 0.024492798      |
| toxicity                     | 90  | 4         | 81     | 93        | 435               | 0.703056769            | 8.15E-04              | 0.024582918 | 0.024582918      |
| growth                       | 91  | 1         | 83     | 107       | 434               | 0.748837209            | 0.001274243           | 0.022861944 | 0.022861943      |
| release                      | 92  | 1         | 77     | 104       | 428               | 0.73853211             | 0.00114401            | 0.021627736 | 0.021627736      |
| mitochondrial biogenesis     | 93  | 3         | 70     | 118       | 412               | 0.789215686            | 0.001638768           | 0.018961982 | 0.018961981      |
| differentiation              | 94  | 3         | 80     | 106       | 400               | 0.74537037             | 0.00118793            | 0.020862226 | 0.020862227      |
| superoxide                   | 95  | 2         | 71     | 106       | 394               | 0.74537037             | 0.001301748           | 0.021030839 | 0.021030839      |
| endothelial dysfunction      | 96  | 2         | 69     | 103       | 392               | 0.735159817            | 0.001057991           | 0.018870674 | 0.018870675      |
| exercise                     | 97  | 3         | 69     | 93        | 391               | 0.703056769            | 8.58E-04              | 0.019906208 | 0.019906208      |
| endothelial-cells            | 98  | 2         | 77     | 118       | 388               | 0.789215686            | 0.001750376           | 0.01892774  | 0.01892774       |
| macrophage                   | 99  | 1         | 72     | 110       | 387               | 0.759433962            | 0.001298514           | 0.018444961 | 0.018444961      |
| pathways                     | 100 | 1         | 66     | 104       | 387               | 0.73853211             | 0.00120135            | 0.018804362 | 0.018804362      |
| exposure                     | 101 | 4         | 72     | 92        | 384               | 0.7                    | 7.92E-04              | 0.022346666 | 0.022346665      |
| biogenesis                   | 102 | 3         | 69     | 101       | 379               | 0.728506787            | 0.001134227           | 0.019244362 | 0.019244362      |
| acute kidney injury          | 103 | 4         | 67     | 97        | 378               | 0.715555556            | 9.72E-04              | 0.020666587 | 0.020666588      |
| dna                          | 104 | 1         | 82     | 104       | 374               | 0.73853211             | 0.001114197           | 0.01977596  | 0.01977596       |
| gene                         | 105 | 1         | 79     | 110       | 371               | 0.759433962            | 0.00136229            | 0.0181819   | 0.018181901      |
| up-regulation                | 106 | 2         | 74     | 108       | 370               | 0.752364449            | 0.001335717           | 0.017344771 | 0.017344771      |
| calcium                      | 107 | 5         | 70     | 105       | 367               | 0.741935484            | 0.00114321            | 0.019174426 | 0.019174426      |
| parkinsons-disease           | 108 | 2         | 67     | 94        | 366               | 0.706140351            | 7.91E-04              | 0.017635931 | 0.017635931      |
| responses                    | 109 | 1         | 74     | 96        | 363               | 0.712389381            | 9.22E-04              | 0.019160242 | 0.019160242      |
| necrosis                     | 110 | 5         | 63     | 105       |                   |                        |                       |             |                  |

|                                   |     |   |    |     |     |             |             |             |             |
|-----------------------------------|-----|---|----|-----|-----|-------------|-------------|-------------|-------------|
| kidney                            | 122 | 4 | 57 | 94  | 333 | 0.706140351 | 7.63E-04    | 0.017642108 | 0.017642108 |
| mitochondrial permeability transi | 123 | 5 | 66 | 94  | 331 | 0.706140351 | 9.42E-04    | 0.016812739 | 0.016812739 |
| signaling pathway                 | 124 | 5 | 55 | 109 | 331 | 0.755868545 | 0.001337968 | 0.017899017 | 0.017899017 |
| rat                               | 125 | 4 | 59 | 103 | 330 | 0.735159817 | 0.001283379 | 0.016320193 | 0.016320193 |
| epithelial-cells                  | 126 | 1 | 72 | 108 | 328 | 0.752336449 | 0.001286666 | 0.017897918 | 0.017897917 |
| free radicals                     | 127 | 2 | 50 | 110 | 327 | 0.759433962 | 0.001436418 | 0.015029677 | 0.015029677 |
| association                       | 128 | 3 | 70 | 98  | 323 | 0.71875     | 0.001016395 | 0.017781991 | 0.017781991 |
| reperfusion injury                | 129 | 5 | 62 | 91  | 321 | 0.696969697 | 7.65E-04    | 0.016268004 | 0.016268004 |
| cardiovascular-disease            | 130 | 3 | 64 | 91  | 318 | 0.696969697 | 9.25E-04    | 0.017085819 | 0.017085818 |
| infection                         | 131 | 1 | 69 | 92  | 316 | 0.7         | 7.62E-04    | 0.016451326 | 0.016451326 |
| ischemia                          | 132 | 5 | 62 | 87  | 314 | 0.685106383 | 8.12E-04    | 0.017283406 | 0.017283406 |
| identification                    | 133 | 1 | 73 | 90  | 313 | 0.693965517 | 8.04E-04    | 0.018570066 | 0.018570066 |
| heart-failure                     | 134 | 5 | 56 | 100 | 312 | 0.725225225 | 8.83E-04    | 0.016915896 | 0.016915896 |
| permeability transition pore      | 135 | 5 | 58 | 106 | 311 | 0.74537037  | 0.001543423 | 0.015256616 | 0.015256616 |
| muscle                            | 136 | 3 | 58 | 92  | 310 | 0.7         | 7.03E-04    | 0.016556938 | 0.016556938 |
| risk                              | 137 | 3 | 70 | 91  | 308 | 0.696969697 | 7.58E-04    | 0.016341791 | 0.016341791 |
| skeletal muscle                   | 138 | 3 | 53 | 88  | 307 | 0.688034188 | 8.07E-04    | 0.015647175 | 0.015647176 |
| acid                              | 139 | 4 | 65 | 98  | 307 | 0.71875     | 9.73E-04    | 0.016364597 | 0.016364597 |
| fatty liver disease               | 140 | 3 | 60 | 79  | 306 | 0.66255144  | 5.02E-04    | 0.015584074 | 0.015584074 |
| fission                           | 141 | 1 | 56 | 85  | 303 | 0.679324895 | 6.91E-04    | 0.015974873 | 0.015974873 |
| glycolysis                        | 142 | 1 | 51 | 89  | 302 | 0.690987124 | 8.38E-04    | 0.016558495 | 0.016558495 |
| nrf2                              | 143 | 2 | 52 | 96  | 299 | 0.712389381 | 9.55E-04    | 0.016287563 | 0.016287563 |
| parkinsons disease                | 144 | 2 | 54 | 76  | 299 | 0.654471545 | 4.84E-04    | 0.014435688 | 0.014435688 |
| cell death                        | 145 | 5 | 51 | 102 | 299 | 0.731818182 | 0.0011838   | 0.015227629 | 0.015227629 |
| permeability transition           | 146 | 5 | 62 | 97  | 299 | 0.715555556 | 9.19E-04    | 0.014944349 | 0.014944349 |
| fatty-acid oxidation              | 147 | 3 | 58 | 93  | 296 | 0.703056769 | 8.79E-04    | 0.013659645 | 0.013659645 |
| life-span                         | 148 | 3 | 59 | 97  | 296 | 0.715555556 | 9.17E-04    | 0.014242647 | 0.014242647 |
| smooth-muscle-cells               | 149 | 2 | 59 | 85  | 295 | 0.679324895 | 7.19E-04    | 0.014792442 | 0.014792442 |
| resistance                        | 150 | 1 | 58 | 94  | 292 | 0.706140351 | 8.63E-04    | 0.013993737 | 0.013993737 |
| central-nervous-system            | 151 | 2 | 62 | 74  | 291 | 0.649193548 | 4.64E-04    | 0.014449328 | 0.014449328 |
| mitochondrial                     | 152 | 1 | 51 | 109 | 290 | 0.755868545 | 0.001601742 | 0.014599234 | 0.014599234 |
| oxidative damage                  | 153 | 2 | 57 | 96  | 286 | 0.712389381 | 0.001010459 | 0.013864255 | 0.013864256 |
| proteins                          | 154 | 1 | 58 | 100 | 282 | 0.725225225 | 0.001100344 | 0.014831735 | 0.014831735 |
| signaling pathways                | 155 | 3 | 50 | 101 | 277 | 0.728506787 | 0.001143501 | 0.013490852 | 0.013490852 |
| unfolded protein response         | 156 | 5 | 58 | 82  | 270 | 0.670833333 | 5.73E-04    | 0.013441646 | 0.013441646 |
| immunity                          | 157 | 1 | 51 | 94  | 264 | 0.706140351 | 9.47E-04    | 0.013008496 | 0.013008495 |
| hepatic steatosis                 | 158 | 3 | 50 | 84  | 253 | 0.676470588 | 6.82E-04    | 0.011367239 | 0.011367239 |
| cytochrome-c release              | 159 | 5 | 51 | 85  | 252 | 0.679324895 | 7.85E-04    | 0.013363108 | 0.013363109 |
| neutrophils                       | 160 | 1 | 50 | 81  | 247 | 0.668049793 | 5.92E-04    | 0.013908542 | 0.013908542 |
| energy-metabolism                 | 161 | 3 | 53 | 91  | 245 | 0.696969697 | 9.23E-04    | 0.011761585 | 0.011761586 |
| dendritic cells                   | 162 | 1 | 53 | 79  | 223 | 0.66255144  | 5.27E-04    | 0.011056947 | 0.011056947 |
