# Supplementary material for: Hotspot and Frontier Analysis of Exercise Training Therapy for Heart Failure Complicated With Depression Based on Web of Science Database and Big Data Analysis
Source: PubMed Central journal article supplement (PMC8169975; doi:10.3389/fcvm.2021.665993), 2021-05-19
Supplement: Table_3.pdf [file Table_3.pdf]

Supplemental Table 3. Co-occurrence analysis of "oxidative stress" AND "mitochondria" studies in 2020

| Count | Degree | Centrality | Year | Keyword                          |
|-------|--------|------------|------|----------------------------------|
| 6     | 11     | 0          | 2020 | mcu                              |
| 6     | 4      | 0          | 2020 | cardiovascular disease           |
| 6     | 7      | 0          | 2020 | inflammatory bowel disease       |
| 6     | 11     | 0          | 2020 | chain fatty acid                 |
| 6     | 7      | 0          | 2020 | high resolution respirometry     |
| 6     | 8      | 0          | 2020 | anxiety                          |
| 6     | 8      | 0          | 2020 | lipid droplet                    |
| 6     | 2      | 0          | 2020 | apigenin                         |
| 6     | 8      | 0          | 2020 | long noncoding rna               |
| 6     | 6      | 0          | 2020 | acute myeloid leukemia           |
| 6     | 7      | 0          | 2020 | aldehyde dehydrogenase           |
| 6     | 5      | 0          | 2020 | competence                       |
| 6     | 12     | 0          | 2020 | d-galactose                      |
| 6     | 10     | 0          | 2020 | mitochondrial calcium uniporter  |
| 7     | 10     | 0          | 2020 | nash                             |
| 7     | 7      | 0          | 2020 | oligodendrocyte                  |
| 7     | 10     | 0          | 2020 | defense                          |
| 7     | 15     | 0          | 2020 | nonalcoholic fatty liver disease |
| 7     | 48     | 0          | 2020 | infarction                       |
| 7     | 8      | 0          | 2020 | semen quality                    |
| 7     | 16     | 0          | 2020 | mitochondrial transfer           |
| 7     | 7      | 0          | 2020 | mitochondrial apoptosis          |
| 7     | 8      | 0          | 2020 | lactate                          |
| 7     | 9      | 0          | 2020 | mitochondrial homeostasis        |
| 7     | 8      | 0          | 2020 | pressure                         |
| 7     | 8      | 0          | 2020 | inflammaging                     |
| 7     | 7      | 0          | 2020 | blood-brain barrier              |
| 7     | 15     | 0          | 2020 | cognitive deficit                |
| 7     | 3      | 0          | 2020 | uric acid                        |
| 7     | 9      | 0          | 2020 | sirtuin 3                        |
| 7     | 5      | 0          | 2020 | osteoblast                       |
| 8     | 6      | 0          | 2020 | ketogenic diet                   |
| 8     | 15     | 0          | 2020 | parameter                        |
| 8     | 7      | 0          | 2020 | astaxanthin                      |
| 8     | 5      | 0          | 2020 | developmental competence         |
| 8     | 9      | 0          | 2020 | mitochondrial dynamics           |
| 9     | 2      | 0          | 2020 | polysaccharide                   |
| 9     | 4      | 0          | 2020 | nadph                            |
| 9     | 9      | 0          | 2020 | combination                      |

|           |    |   |      |                          |
|-----------|----|---|------|--------------------------|
| <b>9</b>  | 3  | 0 | 2020 | mitochondrial ro         |
| <b>9</b>  | 3  | 0 | 2020 | sulforaphane             |
| <b>10</b> | 6  | 0 | 2020 | inflammasome activation  |
| <b>11</b> | 4  | 0 | 2020 | gut microbiota           |
| <b>12</b> | 12 | 0 | 2020 | nafld                    |
| <b>13</b> | 2  | 0 | 2020 | mitochondria dysfunction |
