# Supplementary material for: Hotspot and Frontier Analysis of Exercise Training Therapy for Heart Failure Complicated With Depression Based on Web of Science Database and Big Data Analysis
Source: PubMed Central journal article supplement (PMC8169975; doi:10.3389/fcvm.2021.665993), 2021-05-19
Supplement: Table_4.pdf [file Table_4.pdf]

| Label                                | ID  | partiton | vector | AllDegree | WeightedAllDegree | AllclosenessCentrality | BetweennessCentrality | HubWeights  | AuthorityWeights |
|--------------------------------------|-----|----------|--------|-----------|-------------------|------------------------|-----------------------|-------------|------------------|
| oxidative stress                     | 1   | 2        | 18912  | 199       | 93702             | 1                      | 3.93E-04              | 0.574650277 | 0.574650536      |
| mitochondria                         | 2   | 2        | 12449  | 199       | 67196             | 1                      | 3.93E-04              | 0.51033377  | 0.51033377       |
| apoptosis                            | 3   | 3        | 5854   | 199       | 35040             | 1                      | 3.93E-04              | 0.310693238 | 0.310693198      |
| activation                           | 4   | 3        | 2449   | 198       | 14666             | 0.995                  | 3.90E-04              | 0.13874272  | 0.138742709      |
| reactive oxygen species              | 5   | 1        | 2418   | 198       | 14615             | 0.995                  | 3.90E-04              | 0.136361347 | 0.136361341      |
| expression                           | 6   | 3        | 2522   | 199       | 13618             | 1                      | 3.93E-04              | 0.130520524 | 0.130520511      |
| cell-death                           | 7   | 1        | 2109   | 196       | 12512             | 0.985148515            | 3.84E-04              | 0.119335423 | 0.119335409      |
| dysfunction                          | 8   | 2        | 2069   | 199       | 12081             | 1                      | 3.93E-04              | 0.111511626 | 0.111511613      |
| mechanisms                           | 9   | 3        | 1571   | 198       | 9372              | 0.995                  | 3.90E-04              | 0.09004243  | 0.090042424      |
| autophagy                            | 10  | 2        | 1471   | 199       | 9058              | 1                      | 3.93E-04              | 0.083794941 | 0.083794933      |
| cells                                | 11  | 5        | 1627   | 194       | 9019              | 0.975490196            | 3.71E-04              | 0.087729358 | 0.087729349      |
| metabolism                           | 12  | 2        | 1672   | 199       | 8938              | 1                      | 3.93E-04              | 0.085950187 | 0.085950181      |
| mitochondrial dysfunction            | 13  | 4        | 1576   | 199       | 8851              | 1                      | 3.93E-04              | 0.078987025 | 0.078987007      |
| inhibition                           | 14  | 3        | 1419   | 197       | 8544              | 0.990049751            | 3.74E-04              | 0.079193343 | 0.079193338      |
| damage                               | 15  | 5        | 1358   | 197       | 7981              | 0.990049751            | 3.85E-04              | 0.075774338 | 0.075774331      |
| nitric-oxide                         | 16  | 1        | 1395   | 197       | 7852              | 0.990049751            | 3.78E-04              | 0.073000174 | 0.073000165      |
| hydrogen-peroxide                    | 17  | 1        | 1436   | 199       | 7785              | 1                      | 3.93E-04              | 0.0741361   | 0.07413609       |
| death                                | 18  | 3        | 1242   | 196       | 7750              | 0.985148515            | 3.81E-04              | 0.075935437 | 0.075935431      |
| lipid-peroxidation                   | 19  | 5        | 1376   | 199       | 7605              | 1                      | 3.93E-04              | 0.069438841 | 0.069438832      |
| ros                                  | 20  | 3        | 1265   | 199       | 7580              | 1                      | 3.93E-04              | 0.074157229 | 0.074157226      |
| stress                               | 21  | 2        | 1320   | 198       | 7165              | 0.995                  | 3.91E-04              | 0.052954712 | 0.052954721      |
| antioxidant                          | 22  | 5        | 1162   | 198       | 6935              | 0.995                  | 3.89E-04              | 0.067184267 | 0.067184261      |
| glutathione                          | 23  | 5        | 1184   | 197       | 6905              | 0.990049751            | 3.76E-04              | 0.066193267 | 0.066193262      |
| in-vitro                             | 24  | 3        | 1288   | 198       | 6878              | 0.995                  | 3.93E-04              | 0.069043167 | 0.069043157      |
| brain                                | 25  | 4        | 1075   | 199       | 6685              | 1                      | 3.93E-04              | 0.061112373 | 0.061112369      |
| cytochrome-c                         | 26  | 1        | 1061   | 197       | 6555              | 0.990049751            | 3.82E-04              | 0.063404192 | 0.063404187      |
| gene-expression                      | 27  | 2        | 1351   | 199       | 6515              | 1                      | 3.93E-04              | 0.064640768 | 0.064640758      |
| disease                              | 28  | 2        | 1152   | 199       | 6288              | 1                      | 3.93E-04              | 0.06018152  | 0.060181514      |
| protein                              | 29  | 2        | 1140   | 196       | 6280              | 0.985148515            | 3.82E-04              | 0.059257559 | 0.059257554      |
| inflammation                         | 30  | 3        | 1126   | 197       | 6185              | 0.990049751            | 3.74E-04              | 0.063116954 | 0.063116948      |
| alzheimers-disease                   | 31  | 4        | 1002   | 197       | 5992              | 0.990049751            | 3.75E-04              | 0.055411172 | 0.055411164      |
| aging                                | 32  | 2        | 956    | 197       | 5938              | 0.990049751            | 3.66E-04              | 0.05522416  | 0.055224156      |
| permeability transition              | 33  | 1        | 942    | 199       | 5679              | 1                      | 3.93E-04              | 0.052632959 | 0.052632954      |
| parkinsons-disease                   | 34  | 4        | 898    | 196       | 5656              | 0.985148515            | 3.54E-04              | 0.049543776 | 0.04954377       |
| toxicity                             | 35  | 5        | 954    | 193       | 5502              | 0.970731707            | 3.40E-04              | 0.052773731 | 0.052773724      |
| skeletal-muscle                      | 36  | 2        | 1012   | 194       | 5449              | 0.975490196            | 3.42E-04              | 0.050652475 | 0.050652469      |
| mice                                 | 37  | 2        | 925    | 198       | 5348              | 0.995                  | 3.85E-04              | 0.049400411 | 0.049400407      |
| reactive oxygen                      | 38  | 1        | 948    | 199       | 5329              | 1                      | 3.93E-04              | 0.049556731 | 0.049556731      |
| injury                               | 39  | 5        | 863    | 195       | 5159              | 0.980295567            | 3.34E-04              | 0.048300758 | 0.048300754      |
| mitophagy                            | 40  | 2        | 775    | 197       | 5035              | 0.990049751            | 3.78E-04              | 0.043454107 | 0.043454101      |
| in-vivo                              | 41  | 4        | 958    | 198       | 5024              | 0.995                  | 3.93E-04              | 0.048666958 | 0.048666951      |
| calcium                              | 42  | 1        | 814    | 199       | 4994              | 1                      | 3.93E-04              | 0.048244484 | 0.048244481      |
| permeability transition pore         | 43  | 1        | 820    | 199       | 4891              | 1                      | 3.93E-04              | 0.044824265 | 0.04482426       |
| dna-damage                           | 44  | 3        | 861    | 195       | 4832              | 0.980295567            | 3.66E-04              | 0.047154163 | 0.047154157      |
| cancer                               | 45  | 3        | 862    | 196       | 4781              | 0.985148515            | 3.65E-04              | 0.04884801  | 0.048848007      |
| neurodegeneration                    | 46  | 4        | 731    | 193       | 4687              | 0.970731707            | 3.24E-04              | 0.043703711 | 0.043703707      |
| induced apoptosis                    | 47  | 3        | 787    | 196       | 4632              | 0.985148515            | 3.58E-04              | 0.042515521 | 0.042515516      |
| antioxidants                         | 48  | 5        | 774    | 197       | 4570              | 0.990049751            | 3.79E-04              | 0.04334538  | 0.043345376      |
| superoxide                           | 49  | 1        | 738    | 198       | 4493              | 0.995                  | 3.89E-04              | 0.040948377 | 0.040948375      |
| parkinsons disease                   | 50  | 4        | 665    | 185       | 4415              | 0.9342723              | 2.77E-04              | 0.040017832 | 0.040017828      |
| nf-kappa-b                           | 51  | 3        | 806    | 195       | 4410              | 0.980295567            | 3.59E-04              | 0.043467983 | 0.043467977      |
| superoxide-dismutase                 | 52  | 5        | 808    | 196       | 4322              | 0.985148515            | 3.77E-04              | 0.040788438 | 0.040788433      |
| complex-i                            | 53  | 1        | 705    | 197       | 4277              | 0.990049751            | 3.65E-04              | 0.03756624  | 0.037566236      |
| pathway                              | 54  | 3        | 693    | 198       | 4200              | 0.995                  | 3.83E-04              | 0.039001001 | 0.039000998      |
| liver                                | 55  | 5        | 701    | 191       | 4146              | 0.961352657            | 3.04E-04              | 0.038997174 | 0.038997171      |
| life-span                            | 56  | 2        | 722    | 195       | 4141              | 0.980295567            | 3.67E-04              | 0.03701881  | 0.037018806      |
| heart                                | 57  | 1        | 672    | 188       | 4039              | 0.947619048            | 2.94E-04              | 0.03729346  | 0.037293458      |
| free radicals                        | 58  | 1        | 601    | 198       | 3978              | 0.995                  | 3.90E-04              | 0.034496078 | 0.034496076      |
| phosphorylation                      | 59  | 2        | 656    | 198       | 3898              | 0.995                  | 3.88E-04              | 0.035668246 | 0.035668246      |
| alzheimers disease                   | 60  | 4        | 594    | 188       | 3746              | 0.947619048            | 3.03E-04              | 0.034946759 | 0.034946755      |
| cytochrome-c release                 | 61  | 1        | 626    | 193       | 3740              | 0.970731707            | 3.63E-04              | 0.035851875 | 0.035851871      |
| mechanism                            | 62  | 5        | 629    | 197       | 3620              | 0.990049751            | 3.86E-04              | 0.033007421 | 0.033007418      |
| induction                            | 63  | 3        | 566    | 190       | 3521              | 0.956730769            | 3.18E-04              | 0.034194064 | 0.034194061      |
| generation                           | 64  | 1        | 566    | 193       | 3507              | 0.970731707            | 3.24E-04              | 0.030809027 | 0.030809025      |
| protects                             | 65  | 5        | 540    | 189       | 3465              | 0.95215311             | 3.20E-04              | 0.032236118 | 0.032236116      |
| nitric-oxide synthase                | 66  | 1        | 628    | 186       | 3346              | 0.938679245            | 2.84E-04              | 0.031403909 | 0.031403905      |
| neuroprotection                      | 67  | 4        | 517    | 191       | 3232              | 0.961352657            | 3.32E-04              | 0.031149669 | 0.031149667      |
| mitochondrial permeability transitor | 68  | 1        | 538    | 194       | 3214              | 0.975490196            | 3.60E-04              | 0.030065838 | 0.030065834      |
| oxidative damage                     | 69  | 4        | 581    | 195       | 3186              | 0.980295567            | 3.70E-04              | 0.023721925 | 0.023721927      |
| free-radicals                        | 70  | 1        | 533    | 197       | 3162              | 0.990049751            | 3.75E-04              | 0.028779503 | 0.0287795        |
| ischemia                             | 71  | 1        | 487    | 192       | 3090              | 0.966019417            | 3.12E-04              | 0.028355135 | 0.028355133      |
| mouse model                          | 72  | 4        | 545    | 193       | 3053              | 0.970731707            | 3.36E-04              | 0.029280074 | 0.02928007       |
| endoplasmic-reticulum stress         | 73  | 3        | 551    | 193       | 3052              | 0.970731707            | 3.61E-04              | 0.028891396 | 0.028891393      |
| insulin-resistance                   | 74  | 2        | 607    | 187       | 3004              | 0.943127962            | 2.89E-04              | 0.029277663 | 0.029277659      |
| respiratory-chain                    | 75  | 1        | 514    | 195       | 2975              | 0.980295567            | 3.73E-04              | 0.026693085 | 0.026693081      |
| rat                                  | 76  | 5        | 492    | 185       | 2970              | 0.9342723              | 2.86E-04              | 0.028022358 | 0.028022355      |
| exposure                             | 77  | 5        | 515    | 185       | 2918              | 0.9342723              | 2.73E-04              | 0.029625747 | 0.029625743      |
| rats                                 | 78  | 5        | 523    | 189       | 2904              | 0.95215311             | 3.06E-04              | 0.028746482 | 0.028746478      |
| cytotoxicity                         | 79  | 3        | 505    | 180       | 2873              | 0.912844037            | 2.49E-04              | 0.030013856 | 0.030013852      |
| oxygen                               | 80  | 1        | 496    | 194       | 2863              | 0.975490196            | 3.33E-04              | 0.026418634 | 0.026418632      |
| model                                | 81  | 4        | 498    | 195       | 2835              | 0.980295567            | 3.72E-04              | 0.027450683 | 0.027450681      |
| gene                                 | 82  | 2        | 572    | 196       | 2817              | 0.985148515            | 3.69E-04              | 0.027626775 | 0.027626775      |
| growth                               | 83  | 3        | 526    | 185       | 2734              | 0.9342723              | 2.74E-04              | 0.027139484 | 0.027139481      |
| induced oxidative stress             | 84  | 5        | 502    | 195       | 2728              | 0.980295567            | 3.64E-04              | 0.020111171 | 0.020111174      |
| fission                              | 85  | 2        | 426    | 191       | 2706              | 0.961352657            | 3.38E-04              | 0.022630369 | 0.022630366      |
| proteins                             | 86  | 2        | 486    | 196       | 2698              | 0.985148515            | 3.81E-04              | 0.025945828 | 0.025945826      |
| cytochrome-c-oxidase                 | 87  | 4        | 504    | 191       | 2668              | 0.961352657            | 3.51E-04              | 0.024608733 | 0.02460873       |
| neurodegenerative diseases           | 88  | 4        | 432    | 182       | 2655              | 0.921296296            | 2.66E-04              | 0.024336875 | 0.024336871      |
| neurons                              | 89  | 4        | 394    | 185       | 2648              | 0.9342723              | 2.79E-04              | 0.024596241 | 0.024596239      |
| hypoxia                              | 90  | 1        | 462    | 195       | 2621              | 0.980295567            | 3.45E-04              | 0.024256385 | 0.024256384      |
| neurotoxicity                        | 91  | 4        | 402    | 181       | 2592              | 0.917050691            | 2.77E-04              | 0.023331362 | 0.02333136       |
| endoplasmic-reticulum                | 92  | 2        | 502    | 190       | 2567              | 0.956730769            | 3.42E-04              | 0.026483012 | 0.026483008      |
| melatonin                            | 93  | 5        | 371    | 190       | 2506              | 0.956730769            | 3.34E-04              | 0.023369116 | 0.023369115      |
| ischemia-reperfusion injury          | 94  | 1        | 449    | 185       | 2489              | 0.9342723              | 2.93E-04              | 0.02332407  | 0.023324068      |
| nadph oxidase                        | 95  | 1        | 433    | 187       | 2472              | 0.943127962            | 3.14E-04              | 0.023699812 | 0.02369981       |
| respiration                          | 96  | 1        | 416    | 195       | 2445              | 0.980295567            | 3.62E-04              | 0.021921807 | 0.021921805      |
| alpha-synuclein                      | 97  | 4        | 402    | 163       | 2415              | 0.846808511            | 1.80E-04              | 0.021368879 | 0.021368876      |
| activated protein-kinase             | 98  | 2        | 448    | 189       | 2388              | 0.95215311             | 3.51E-04              | 0.021936652 | 0.02193665       |
| energy-metabolism                    | 99  | 2        | 462    | 192       | 2354              | 0.966019417            | 3.57E-04              | 0.02285526  | 0.022855258      |
| identification                       | 100 | 2        | 489    | 191       | 2348              | 0.961352657            | 3.40E-04              | 0.023105351 | 0.023105351      |
| cancer-cells                         | 101 | 3        | 431    | 185       | 2314              | 0.9342723              | 2.85E-04              | 0.023678091 | 0.023678089      |
| nitric oxide                         | 102 | 1        | 362    | 192       | 2284              | 0.966019417            | 3.39E-04              | 0.020708461 | 0.02070846       |
| biogenesis                           | 103 | 2        | 387    | 189       | 2280              | 0.95215311             | 3.05E-04              | 0.019288727 | 0.019288724      |
| fusion                               | 104 | 2        | 349    | 184       | 2250              | 0.929906542            | 3.23E-04              | 0.018793826 | 0.018793824      |
| saccharomyces-cerevisiae             | 105 | 2        | 497    | 174       | 2240              | 0.888392857            | 2.54E-04              | 0.021564769 | 0.021564766      |
| hydrogen peroxide                    | 106 | 1        | 356    | 192       | 2224              | 0.966019417            | 3.16E-04              | 0.020965019 | 0.020965018      |

|                                  |     |   |     |     |      |             |          |             |             |
|----------------------------------|-----|---|-----|-----|------|-------------|----------|-------------|-------------|
| dna                              | 107 | 2 | 410 | 190 | 2217 | 0.956730769 | 3.21E-04 | 0.020662443 | 0.020662441 |
| membrane                         | 108 | 1 | 382 | 192 | 2214 | 0.966019417 | 3.34E-04 | 0.020528927 | 0.020528926 |
| mutations                        | 109 | 2 | 438 | 179 | 2194 | 0.908675799 | 2.67E-04 | 0.020124676 | 0.020124673 |
| cell death                       | 110 | 1 | 343 | 194 | 2177 | 0.975490196 | 3.62E-04 | 0.020542819 | 0.020542818 |
| p53                              | 111 | 3 | 342 | 187 | 2162 | 0.943127962 | 3.25E-04 | 0.02087037  | 0.020870368 |
| mitochondrial                    | 112 | 2 | 378 | 192 | 2161 | 0.966019417 | 3.29E-04 | 0.019447339 | 0.019447335 |
| bcl-2                            | 113 | 3 | 310 | 184 | 2148 | 0.929906542 | 2.85E-04 | 0.02049506  | 0.02049506  |
| release                          | 114 | 1 | 348 | 186 | 2146 | 0.938679245 | 3.17E-04 | 0.020232954 | 0.020232953 |
| proliferation                    | 115 | 3 | 376 | 183 | 2136 | 0.925581395 | 2.58E-04 | 0.021235903 | 0.021235901 |
| obesity                          | 116 | 2 | 413 | 171 | 2121 | 0.876651982 | 2.13E-04 | 0.020941868 | 0.020941866 |
| involvement                      | 117 | 3 | 332 | 191 | 2115 | 0.961352657 | 3.42E-04 | 0.020354385 | 0.020354383 |
| diabetes                         | 118 | 2 | 354 | 188 | 2077 | 0.947619048 | 2.96E-04 | 0.020108546 | 0.020108545 |
| overexpression                   | 119 | 2 | 346 | 187 | 2044 | 0.943127962 | 2.88E-04 | 0.019119852 | 0.01911985  |
| lipid peroxidation               | 120 | 5 | 339 | 187 | 2042 | 0.943127962 | 3.13E-04 | 0.017591013 | 0.017591012 |
| acid                             | 121 | 5 | 363 | 181 | 2017 | 0.917050691 | 2.47E-04 | 0.019887335 | 0.019887334 |
| nrf2                             | 122 | 3 | 331 | 186 | 2003 | 0.938679245 | 2.95E-04 | 0.019176268 | 0.019176266 |
| electron-transport               | 123 | 1 | 395 | 187 | 1967 | 0.943127962 | 3.17E-04 | 0.017799719 | 0.017799717 |
| pathogenesis                     | 124 | 4 | 341 | 182 | 1959 | 0.921296296 | 2.65E-04 | 0.018448132 | 0.018448131 |
| exercise                         | 125 | 2 | 342 | 175 | 1952 | 0.892376682 | 2.17E-04 | 0.017348159 | 0.017348157 |
| necrosis                         | 126 | 3 | 286 | 182 | 1949 | 0.921296296 | 2.81E-04 | 0.018833407 | 0.018833406 |
| survival                         | 127 | 3 | 325 | 187 | 1937 | 0.943127962 | 3.00E-04 | 0.018771916 | 0.018771915 |
| pathways                         | 128 | 3 | 298 | 184 | 1866 | 0.929906542 | 2.99E-04 | 0.018719406 | 0.018719405 |
| dna damage                       | 129 | 3 | 324 | 188 | 1854 | 0.947619048 | 3.16E-04 | 0.018290637 | 0.018290635 |
| bax                              | 130 | 3 | 272 | 178 | 1846 | 0.904545455 | 2.56E-04 | 0.017340995 | 0.017340993 |
| brain mitochondria               | 131 | 1 | 299 | 177 | 1845 | 0.900452489 | 2.61E-04 | 0.014779929 | 0.014779926 |
| bioenergetics                    | 132 | 2 | 304 | 195 | 1843 | 0.980295567 | 3.61E-04 | 0.017427588 | 0.017427587 |
| endothelial-cells                | 133 | 1 | 334 | 191 | 1843 | 0.961352657 | 3.43E-04 | 0.017872634 | 0.017872632 |
| mitochondrial dynamics           | 134 | 2 | 283 | 181 | 1837 | 0.917050691 | 3.15E-04 | 0.014741844 | 0.014741841 |
| er stress                        | 135 | 3 | 302 | 183 | 1824 | 0.925581395 | 2.98E-04 | 0.017123169 | 0.017123167 |
| up-regulation                    | 136 | 3 | 319 | 193 | 1822 | 0.970731707 | 3.54E-04 | 0.016527889 | 0.016527887 |
| senescence                       | 137 | 2 | 322 | 181 | 1821 | 0.917050691 | 2.53E-04 | 0.018435151 | 0.01843515  |
| mitochondrial biogenesis         | 138 | 2 | 312 | 185 | 1820 | 0.9342723   | 3.18E-04 | 0.015287016 | 0.015287013 |
| manganese superoxide-dismutase   | 139 | 1 | 337 | 183 | 1817 | 0.925581395 | 2.78E-04 | 0.017209346 | 0.017209344 |
| pc12 cells                       | 140 | 4 | 263 | 175 | 1797 | 0.892376682 | 2.37E-04 | 0.016941026 | 0.016941024 |
| superoxide-production            | 141 | 1 | 324 | 184 | 1794 | 0.929906542 | 3.02E-04 | 0.016545352 | 0.01654535  |
| degradation                      | 142 | 2 | 323 | 182 | 1793 | 0.921296296 | 2.92E-04 | 0.01591938  | 0.015919378 |
| reperfusion injury               | 143 | 1 | 317 | 177 | 1793 | 0.900452489 | 2.30E-04 | 0.016578063 | 0.016578061 |
| resistance                       | 144 | 2 | 339 | 177 | 1765 | 0.900452489 | 2.51E-04 | 0.016775008 | 0.016775007 |
| oxidative phosphorylation        | 145 | 1 | 313 | 191 | 1764 | 0.961352657 | 3.30E-04 | 0.015142493 | 0.015142492 |
| peroxynitrite                    | 146 | 1 | 288 | 178 | 1750 | 0.904545455 | 2.58E-04 | 0.015454887 | 0.015454887 |
| electron-transport chain         | 147 | 1 | 300 | 177 | 1740 | 0.900452489 | 2.52E-04 | 0.014890879 | 0.014890877 |
| caloric restriction              | 148 | 2 | 284 | 172 | 1736 | 0.880530973 | 2.31E-04 | 0.014529969 | 0.014529968 |
| antioxidant enzymes              | 149 | 5 | 312 | 189 | 1732 | 0.95215311  | 3.01E-04 | 0.01569151  | 0.015691508 |
| heart-failure                    | 150 | 1 | 335 | 173 | 1727 | 0.884444444 | 2.10E-04 | 0.017764589 | 0.017764587 |
| mitochondrion                    | 151 | 1 | 318 | 193 | 1727 | 0.970731707 | 3.53E-04 | 0.013299746 | 0.013299744 |
| dynamics                         | 152 | 2 | 283 | 183 | 1719 | 0.925581395 | 2.79E-04 | 0.014059422 | 0.01405942  |
| resveratrol                      | 153 | 2 | 274 | 191 | 1715 | 0.961352657 | 3.43E-04 | 0.015909003 | 0.015909002 |
| heart-mitochondria               | 154 | 1 | 297 | 172 | 1704 | 0.880530973 | 2.39E-04 | 0.014123658 | 0.014123655 |
| amyloid-beta                     | 155 | 4 | 259 | 165 | 1683 | 0.854077253 | 1.91E-04 | 0.014852404 | 0.014852402 |
| accumulation                     | 156 | 2 | 297 | 183 | 1676 | 0.925581395 | 2.90E-04 | 0.015682235 | 0.015682233 |
| iron                             | 157 | 4 | 297 | 182 | 1637 | 0.921296296 | 2.64E-04 | 0.016236239 | 0.016236238 |
| rat-brain                        | 158 | 4 | 267 | 177 | 1636 | 0.900452489 | 2.39E-04 | 0.01499481  | 0.014994808 |
| vitamin-e                        | 159 | 5 | 289 | 183 | 1629 | 0.925581395 | 3.18E-04 | 0.015015766 | 0.015015764 |
| unfolded protein response        | 160 | 3 | 289 | 182 | 1621 | 0.921296296 | 3.17E-04 | 0.01525986  | 0.015259858 |
| molecular-mechanisms             | 161 | 3 | 299 | 188 | 1613 | 0.947619048 | 3.36E-04 | 0.015992257 | 0.015992255 |
| differentiation                  | 162 | 3 | 294 | 177 | 1605 | 0.900452489 | 2.35E-04 | 0.016010628 | 0.016010627 |
| cytochrome c                     | 163 | 1 | 231 | 180 | 1602 | 0.912844037 | 2.68E-04 | 0.014980121 | 0.01498012  |
| complex i                        | 164 | 1 | 254 | 187 | 1596 | 0.943127962 | 3.04E-04 | 0.013937898 | 0.013937897 |
| protection                       | 165 | 5 | 273 | 180 | 1593 | 0.912844037 | 2.75E-04 | 0.014709224 | 0.014709222 |
| transport                        | 166 | 5 | 300 | 181 | 1591 | 0.917050691 | 2.73E-04 | 0.015138418 | 0.015138417 |
| a-beta                           | 167 | 4 | 261 | 158 | 1579 | 0.829166667 | 1.78E-04 | 0.014463639 | 0.014463637 |
| parkin                           | 168 | 2 | 250 | 162 | 1567 | 0.843220339 | 1.80E-04 | 0.013845447 | 0.013845445 |
| reactive oxygen species (ros)    | 169 | 1 | 263 | 188 | 1539 | 0.947619048 | 3.17E-04 | 0.014218566 | 0.014218564 |
| yeast                            | 170 | 2 | 288 | 165 | 1513 | 0.854077253 | 2.00E-04 | 0.013815243 | 0.013815243 |
| cyclosporine-a                   | 171 | 1 | 256 | 162 | 1508 | 0.843220339 | 1.90E-04 | 0.013383886 | 0.013383883 |
| longevity                        | 172 | 2 | 262 | 166 | 1491 | 0.857758621 | 1.83E-04 | 0.013269485 | 0.013269484 |
| rat-liver                        | 173 | 1 | 285 | 177 | 1487 | 0.900452489 | 2.46E-04 | 0.014416328 | 0.014416326 |
| mitochondrial membrane potential | 174 | 1 | 235 | 188 | 1485 | 0.947619048 | 3.15E-04 | 0.012915961 | 0.012915959 |
| reperfusion                      | 175 | 1 | 223 | 172 | 1463 | 0.880530973 | 2.06E-04 | 0.012647319 | 0.012647318 |
| ischemia-reperfusion             | 176 | 1 | 230 | 171 | 1462 | 0.876651982 | 2.13E-04 | 0.012856209 | 0.012856208 |
| signaling pathway                | 177 | 3 | 259 | 178 | 1445 | 0.904545455 | 2.48E-04 | 0.014376738 | 0.014376736 |
| cadmium                          | 178 | 5 | 239 | 145 | 1443 | 0.786561265 | 1.02E-04 | 0.014096868 | 0.014096866 |
| programmed cell-death            | 179 | 1 | 286 | 175 | 1424 | 0.892376682 | 2.56E-04 | 0.014192322 | 0.01419232  |
| catalase                         | 180 | 5 | 222 | 176 | 1410 | 0.896396396 | 2.33E-04 | 0.012423292 | 0.012423292 |
| skeletal muscle                  | 181 | 2 | 235 | 166 | 1406 | 0.857758621 | 1.78E-04 | 0.012941362 | 0.012941362 |
| kidney                           | 182 | 5 | 230 | 166 | 1404 | 0.857758621 | 1.99E-04 | 0.013913882 | 0.013913881 |
| receptor                         | 183 | 3 | 246 | 177 | 1381 | 0.900452489 | 2.47E-04 | 0.013302565 | 0.013302564 |
| calorie restriction              | 184 | 2 | 247 | 169 | 1366 | 0.868995633 | 2.04E-04 | 0.01272523  | 0.012725229 |
| therapy                          | 185 | 3 | 260 | 177 | 1366 | 0.900452489 | 2.36E-04 | 0.013848948 | 0.013848947 |
| ischemia/reperfusion injury      | 186 | 1 | 229 | 169 | 1363 | 0.868995633 | 2.12E-04 | 0.012537114 | 0.012537113 |
| rat-liver mitochondria           | 187 | 1 | 259 | 167 | 1361 | 0.861471861 | 2.21E-04 | 0.012098474 | 0.012098472 |
| oxidative-phosphorylation        | 188 | 1 | 311 | 184 | 1359 | 0.929906542 | 3.26E-04 | 0.008455747 | 0.008455749 |
| transcription factor             | 189 | 2 | 264 | 176 | 1354 | 0.896396396 | 2.47E-04 | 0.012680125 | 0.012680124 |
| glucose                          | 190 | 2 | 233 | 179 | 1346 | 0.908675799 | 2.43E-04 | 0.012555725 | 0.012555724 |
| age                              | 191 | 2 | 232 | 177 | 1345 | 0.900452489 | 2.69E-04 | 0.012406814 | 0.012406813 |
| oxygen species production        | 192 | 1 | 239 | 182 | 1343 | 0.921296296 | 3.02E-04 | 0.011958876 | 0.011958874 |
| muscle                           | 193 | 2 | 241 | 177 | 1342 | 0.900452489 | 2.32E-04 | 0.012271459 | 0.012271458 |
| kinase                           | 194 | 3 | 223 | 183 | 1331 | 0.925581395 | 2.71E-04 | 0.012397946 | 0.012397945 |
| amyotrophic-lateral-sclerosis    | 195 | 4 | 253 | 162 | 1329 | 0.843220339 | 1.90E-04 | 0.012099103 | 0.012099102 |
| mitochondrial dna                | 196 | 2 | 257 | 179 | 1310 | 0.908675799 | 2.64E-04 | 0.012285928 | 0.012285927 |
| redox regulation                 | 197 | 1 | 251 | 176 | 1310 | 0.896396396 | 2.40E-04 | 0.012567976 | 0.012567974 |
| deficiency                       | 198 | 2 | 246 | 178 | 1306 | 0.904545455 | 2.62E-04 | 0.012161376 | 0.012161375 |
| substantia-nigra                 | 199 | 4 | 215 | 148 | 1302 | 0.796       | 1.30E-04 | 0.011468685 | 0.011468683 |
| transgenic mice                  | 200 | 4 | 234 | 169 | 1288 | 0.868995633 | 2.30E-04 | 0.012117944 | 0.012117942 |
